# Supplementary material
Source: MDPI journal article supplement (https://www.mdpi.com/2504-3900/100/1/8)
Supplement: s1 [file s1]

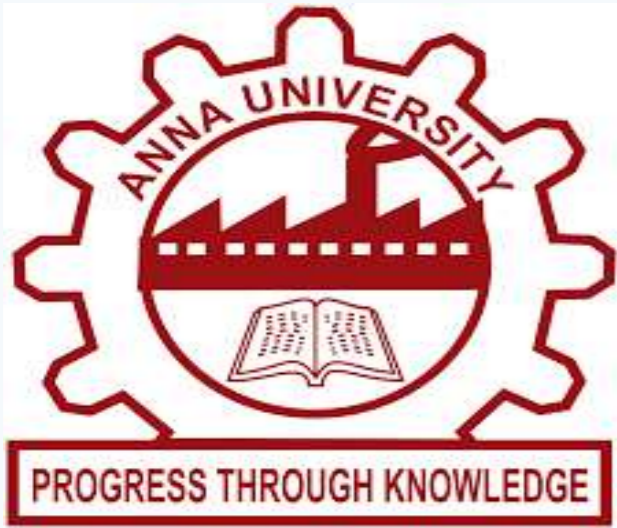

## SYNTHESIS AND PRELIMINARY INVESTIGATION OF METAL NANOPARTICLES FROM THE STEM EXTRACT OF *BACOPA* sp. FOR THE TREATMENT OF LUNG CANCER

YOGESHWARAN M, SELVAMANI P, LATHA S

University College of Engineering, Department of Pharmaceutical Technology & Centre for Excellence in Nanobiotechnology Translational Research (Autonomous), Anna University, BIT campus, Tiruchirappalli, Tamil Nadu, India

### INTRODUCTION

#### Lung cancer:

Lung cancer is one of the big causes of global morbidity and mortality. It is a highly metastatic condition and is the second most prevalent cancer in men and women [Yang et al., 2023].

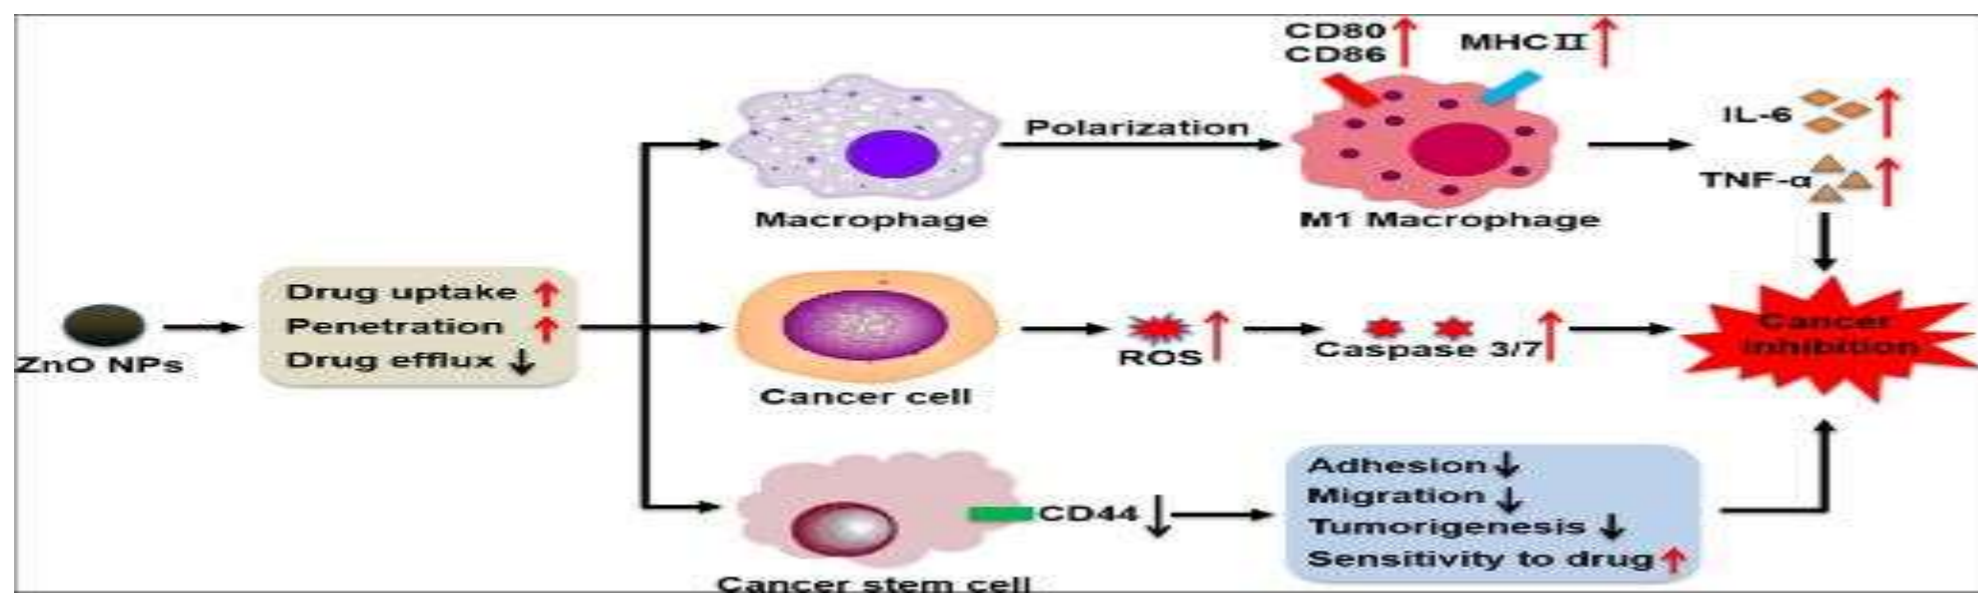

#### *Bacopa monnieri*:

*Bacopa monnieri* reported to possess a wide range of pharmacological activities such as anticancer, antiulcer, antibacterial, antifungal, antioxidant etc. The entire plant is used as nerve tonic in indigenous medicinal system [Banerjee et al., 2021].

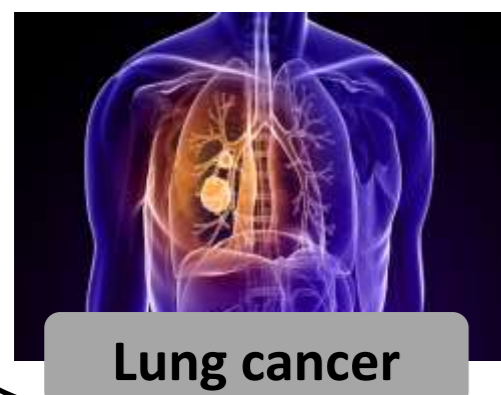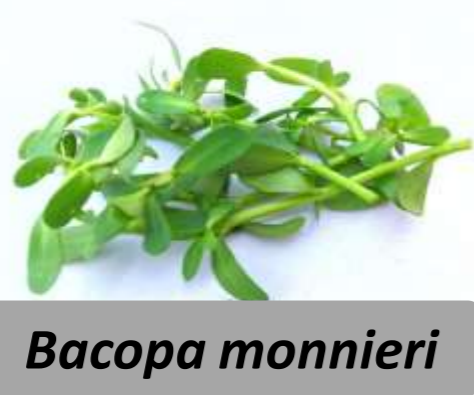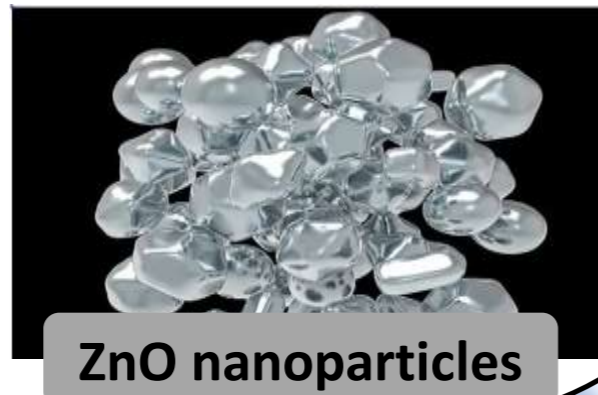

Lung cancer

*Bacopa monnieri*

ZnO nanoparticles

### AIM

To prepare the ZnO nanoparticles with the stem extract of *Bacopa monnieri* and to investigate it for the treatment of lung cancer.

### METHODS

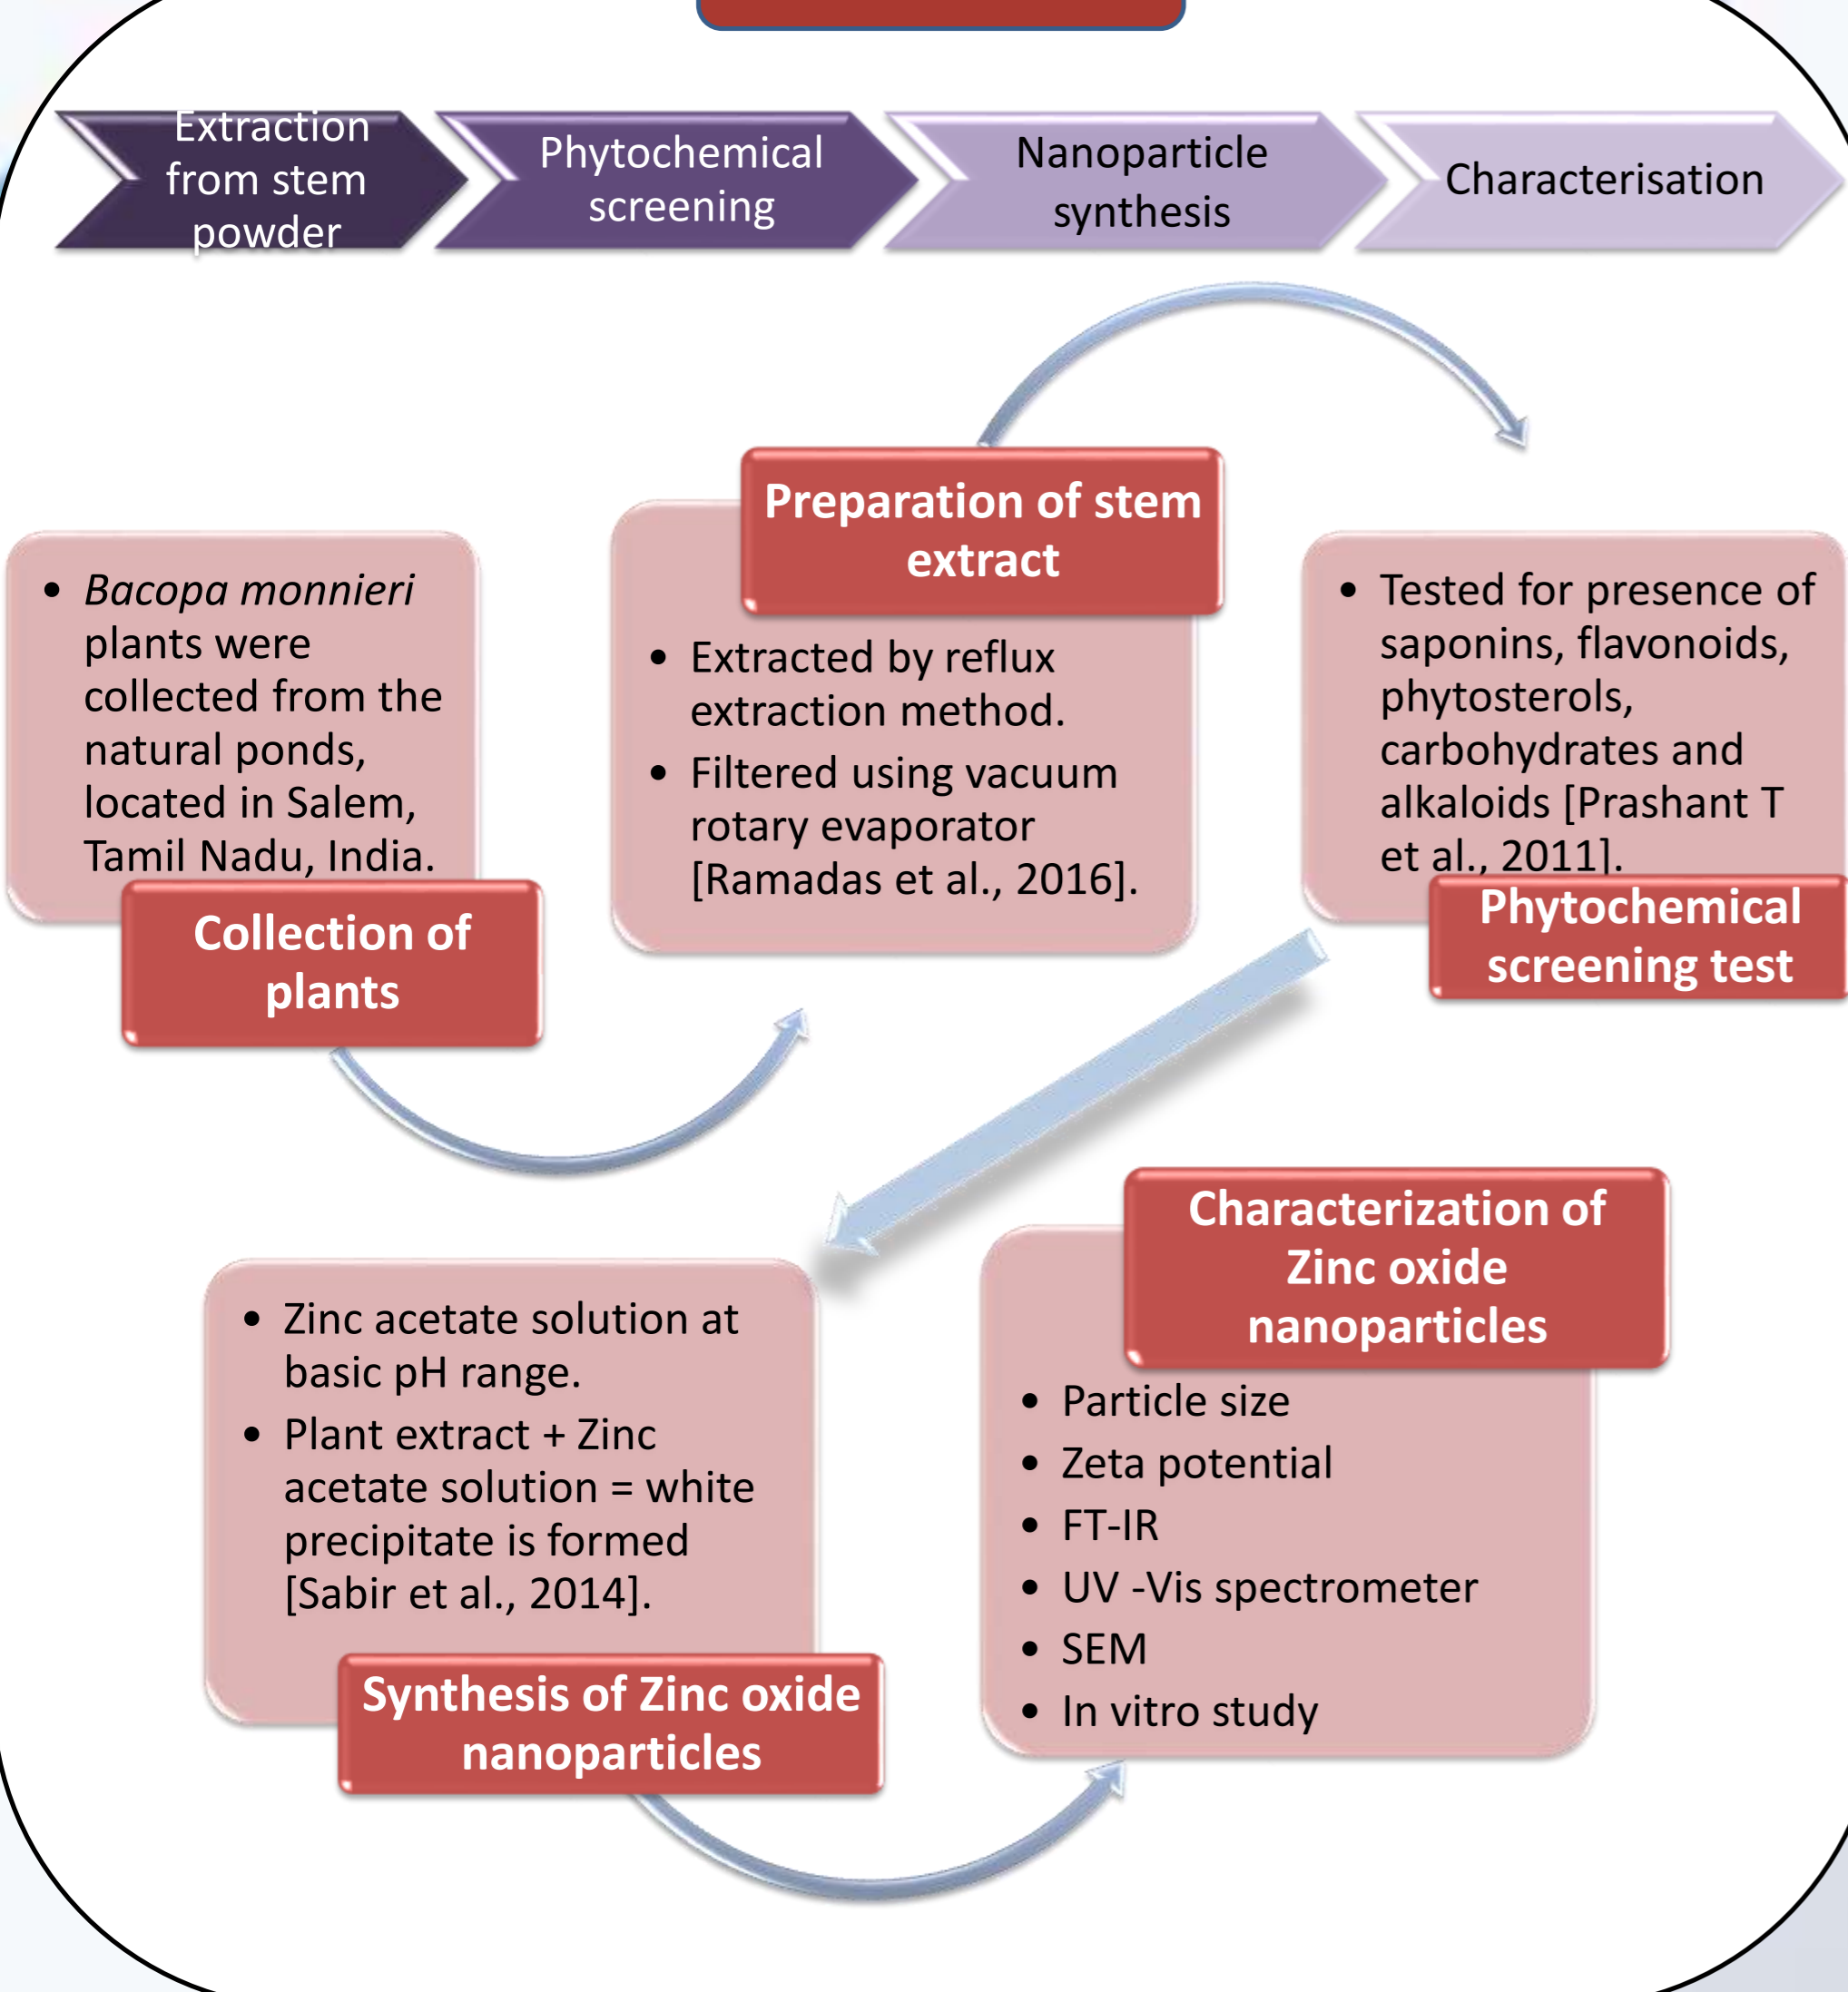

### RESULTS AND DISCUSSION

#### PHYTOCHEMICAL SCREENING TEST

| PHYTOCHEMICALS | INFERENCE |
|----------------|-----------|
| Flavonoids     | Present   |
| Alkaloids      | Present   |
| Proteins       | Present   |
| Phytosterols   | Present   |
| Carbohydrates  | Present   |

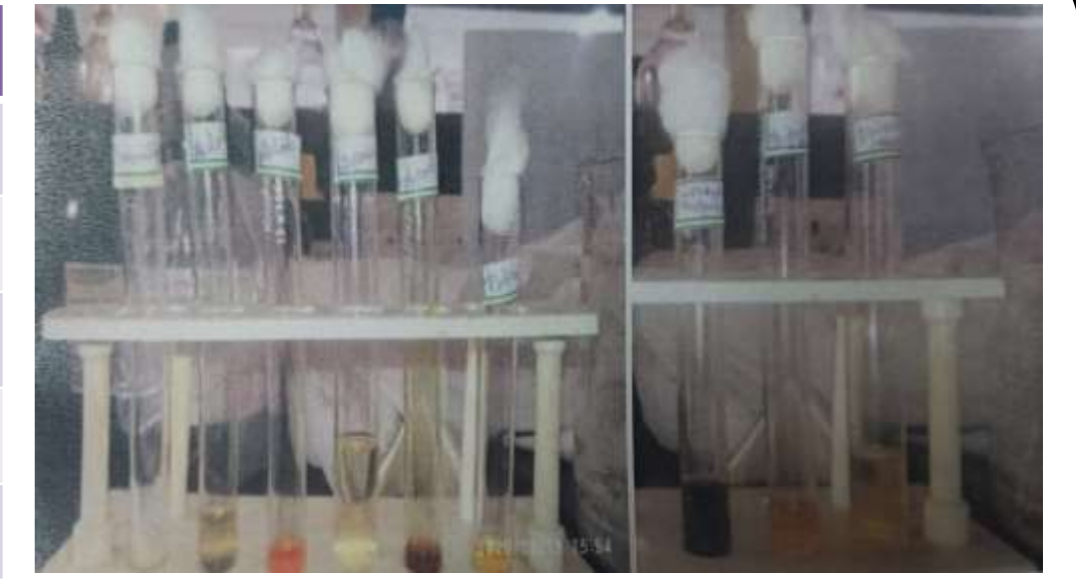

#### PARTICLE SIZE (nm)

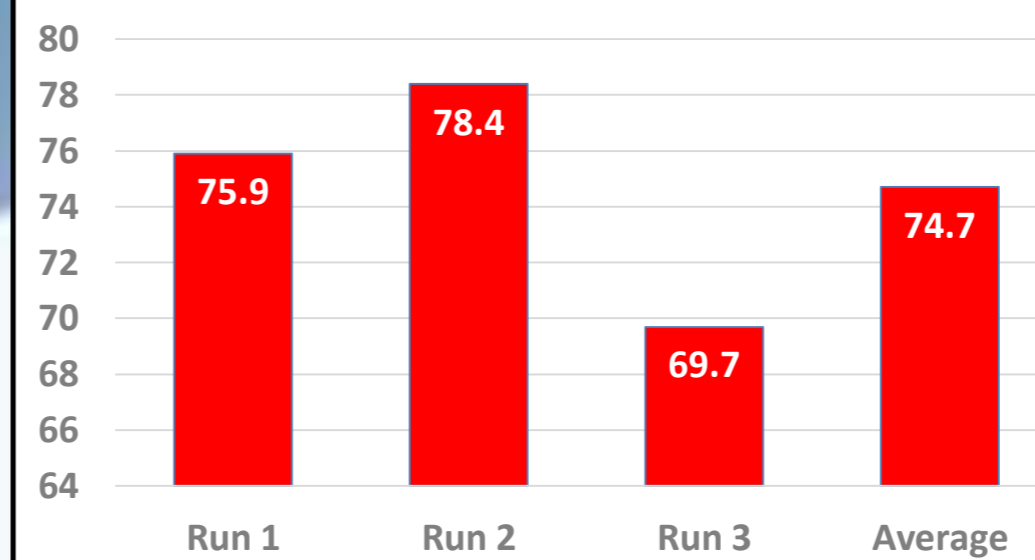

#### ZETA POTENTIAL (mV)

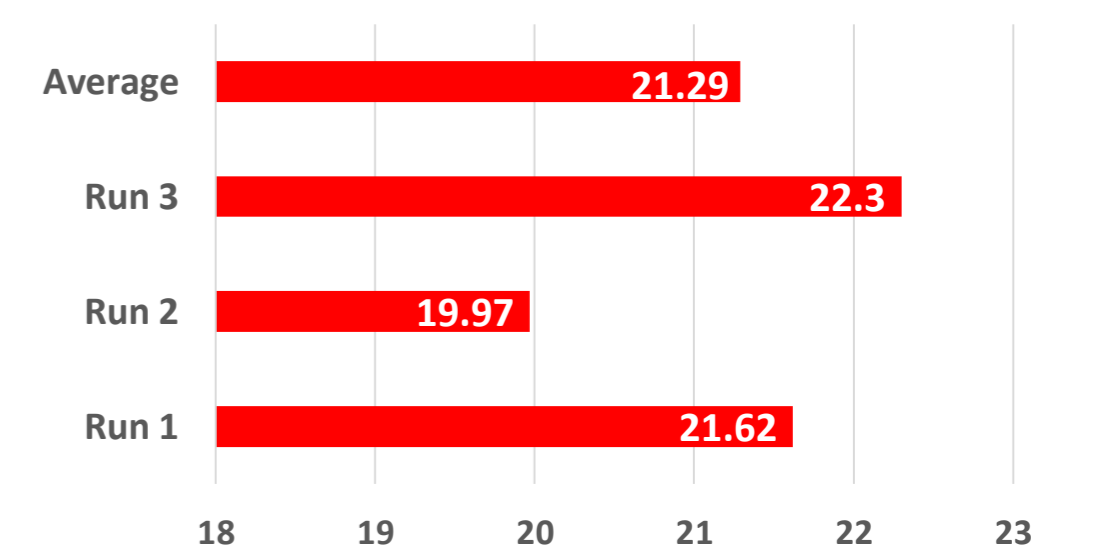

#### FT-IR SPECTRUM

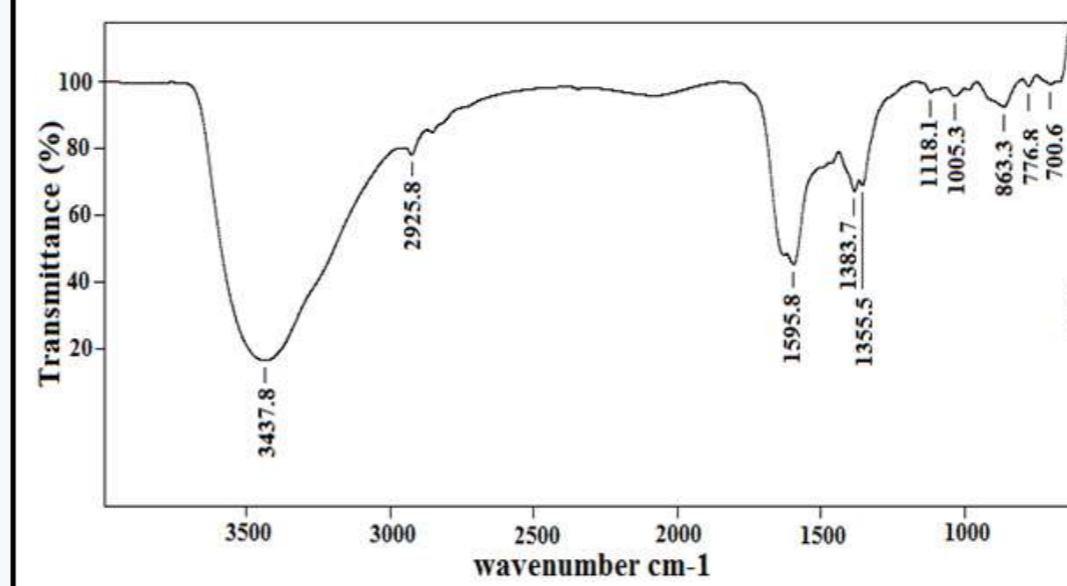

#### UV-VIS SPECTRUM

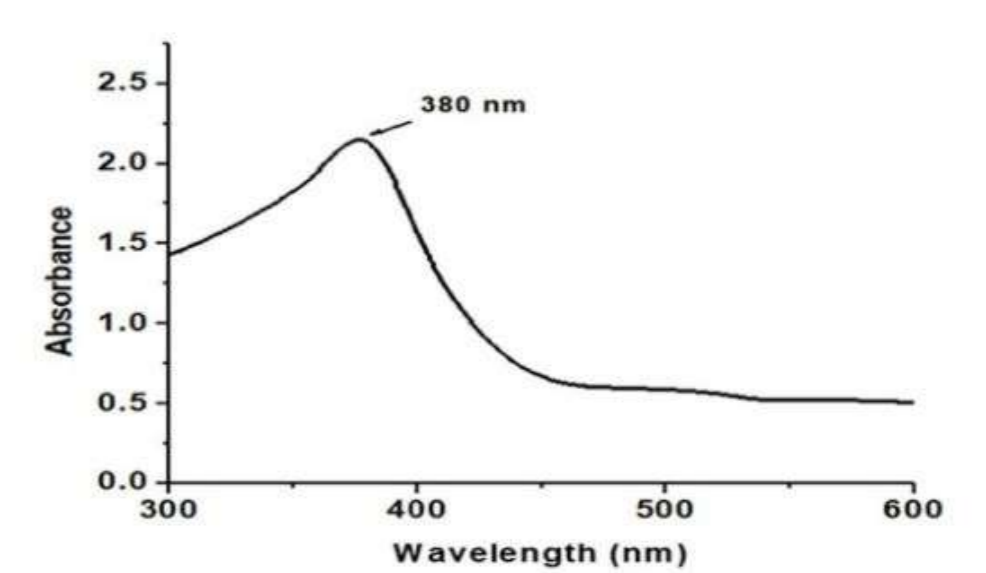

#### SEM

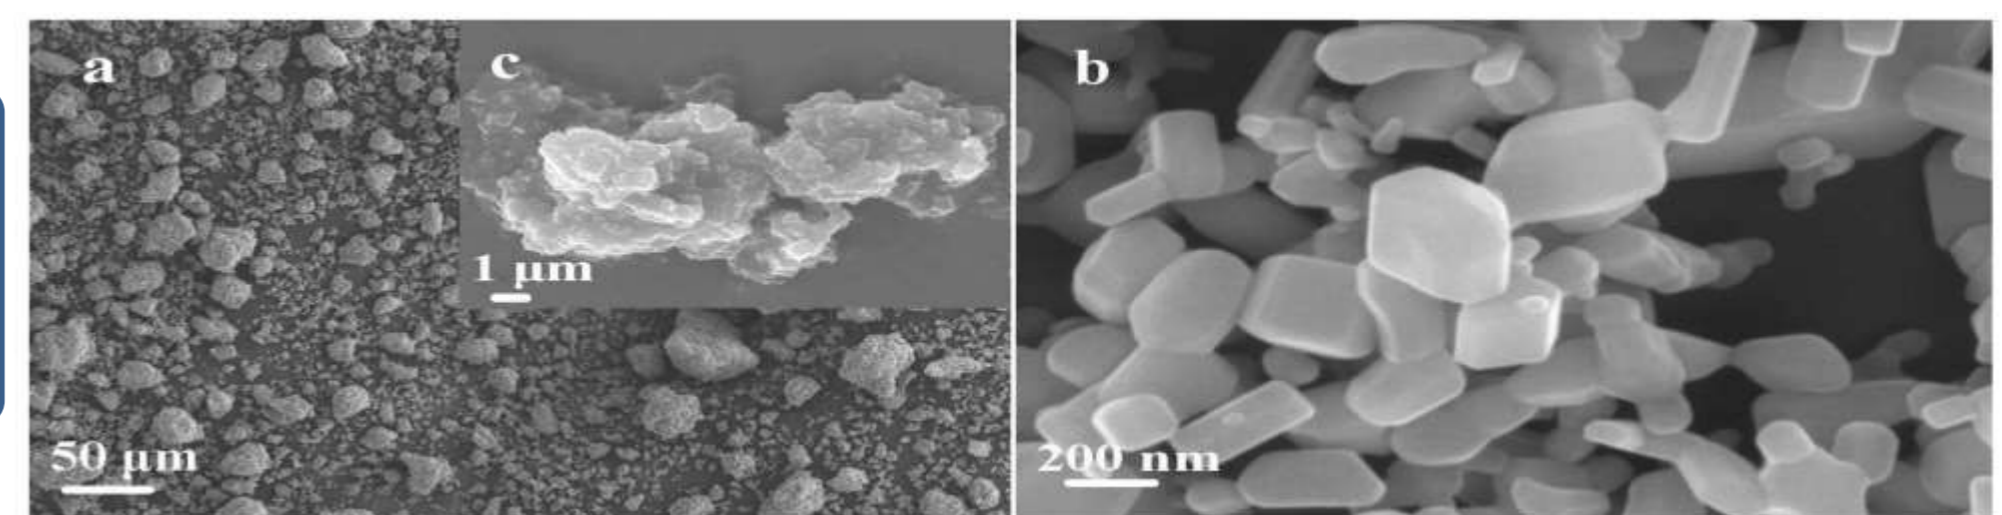

#### Antioxidant activity

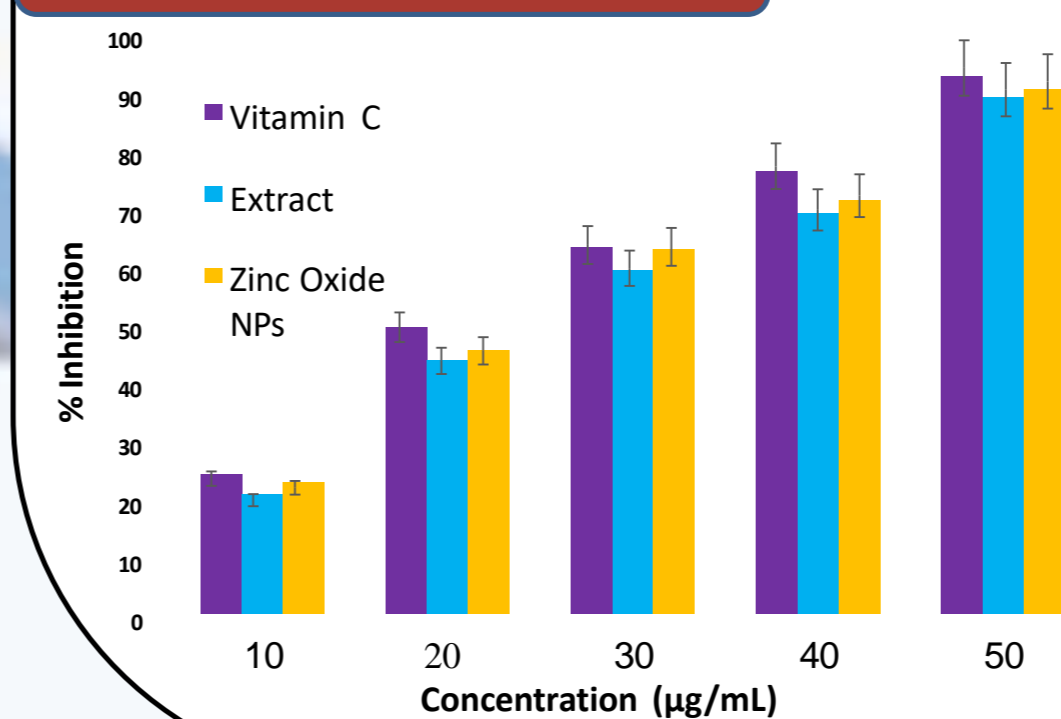

#### Cytotoxicity Analysis

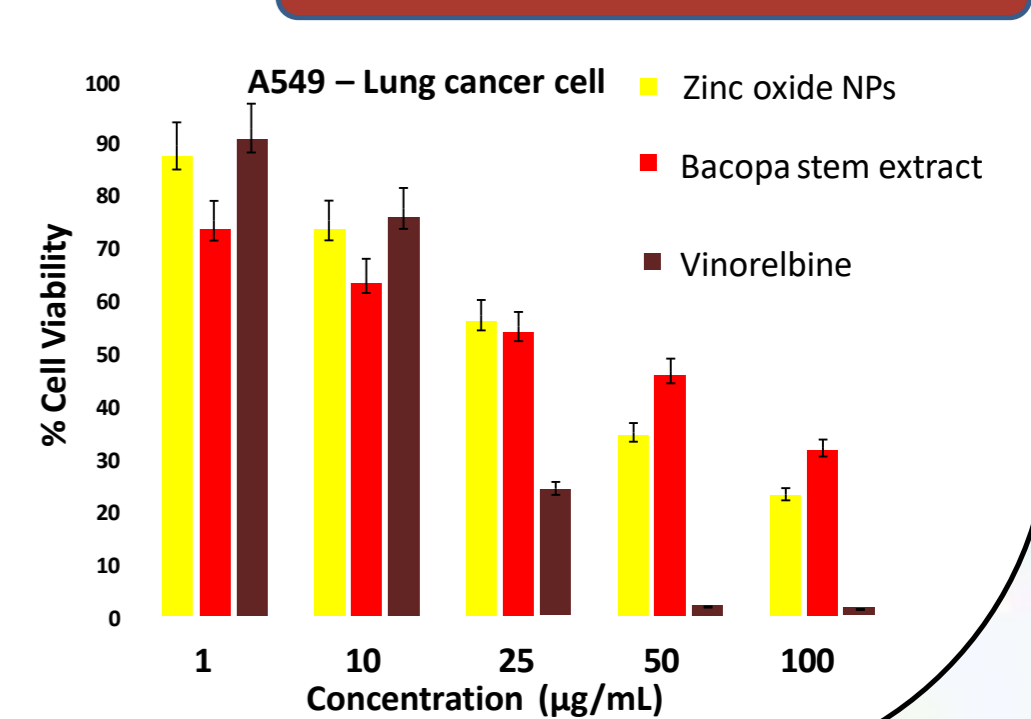

### CONCLUSION

- Nanoparticles were characterized using Zeta sizer, which estimated the average size of the nanoparticle to be 74.7 nm and Zeta potential to be 21.29 mV. Nearly hexagonal quartzite shaped nanoparticles were visualized through SEM analysis.
- The antioxidant activity of ZnO NPs was found to be comparable to standard vitamin C as estimated through DPPH activity. *In vitro* cytotoxicity studies carried out using the MTT assay depicted dose-dependent activity fluctuations in the cytotoxic activity of ZnO NPs.

### FUTURE WORK

Our study requires *in vivo* experiments to better understand ZnO NPs toxicity and future biomedical applications.
